# Supplementary material for: Disruption of mitochondrial unfolded protein response results in telomere shortening in mouse oocytes and somatic cells
Source: Aging (Albany NY). 2024 Feb 12;16(3):2047–60. doi: 10.18632/aging.205543 (PMC10911389; doi:10.18632/aging.205543)
Supplement: Supplementary Figures [file aging-16-205543-s001.pdf]

## SUPPLEMENTARY FIGURES

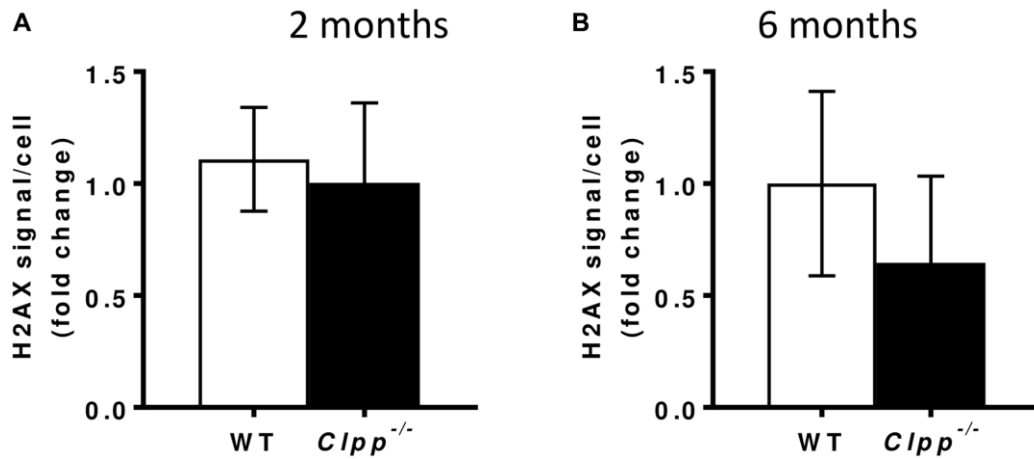

**Supplementary Figure 1.** Quantification of H2AX fluorescence intensity in 2-month (A) and 6-month (B) old mice.

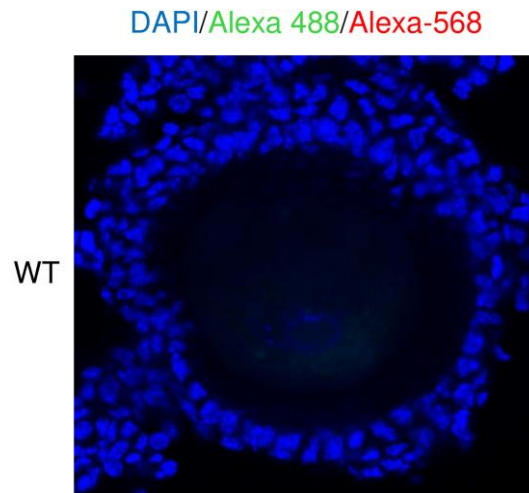

**Supplementary Figure 2.** Representative confocal image of GV oocyte isolated from a 6-month-old WT mice. Negative control for TRF1 and H2AX immunofluorescence. Samples were incubated only with secondary antibodies to check for aspecific staining.
