# Supplementary material for: Disruption of mitochondrial unfolded protein response results in telomere shortening in mouse oocytes and somatic cells
Source: publisher site journal article supplement (doi:10.18632/aging.205543), 2024-02-12
Supplement: Supplementary file [file aging-v16i3-205543-supplementary-material-SD2.pdf]

## SUPPLEMENTARY TABLE

Supplementary Table 1. The list of primers used for quantitative RT-PCR.

| Genes        | Primers sequences                                                                              |
|--------------|------------------------------------------------------------------------------------------------|
| <i>Tel</i>   | F: CGGTTTGTITGGGTTTGGGTTTGGGTTTGGGTTTGGGTTTGGGTT<br>R: GGCTTGCCTTACCTTTACCCTTACCCTTACCCTTACCCT |
| <i>36B4</i>  | F: ACTGGTCTAGGACCCGAGAAG<br>R: TCAATGGTGCCTCTGGAGATT                                           |
| <i>Trf1</i>  | F: TCTAAGGATAGGCCAGATGCCA<br>R: CTGAAATCTGATGGAGCACGTC                                         |
| <i>Trf2</i>  | F: TCAGCTGCTTCAAGTACAATGAG<br>R: GGTTCTGAGGCTGTCTGCTT                                          |
| <i>Pot1a</i> | F: TCTTCGGTTGTGGAAAGCCT<br>R: TGTTTGATGAAAAATCCTCTCACAG                                        |
| <i>H2Ax</i>  | F: TCGGGCCGCGCAAGACTGGCGGCAA<br>R: GTACTCCTGGGAGGCCTGGGTGGCCTT                                 |

Abbreviations: Tel: Telomere length; 36B4: acidic ribosomal phosphoprotein P0; Trf1: telomeric repeat binding factor 1; Trf2: telomeric repeat binding factor 2; Pot1a: Protection of telomeres protein 1a; H2Ax: H2A histone family member X.
